# Supplementary material
Source: PubMed Central journal article supplement (PMC4288815)
Supplement: NIHMS583861-supplement-1.pdf [file NIHMS583861-supplement-1.pdf]

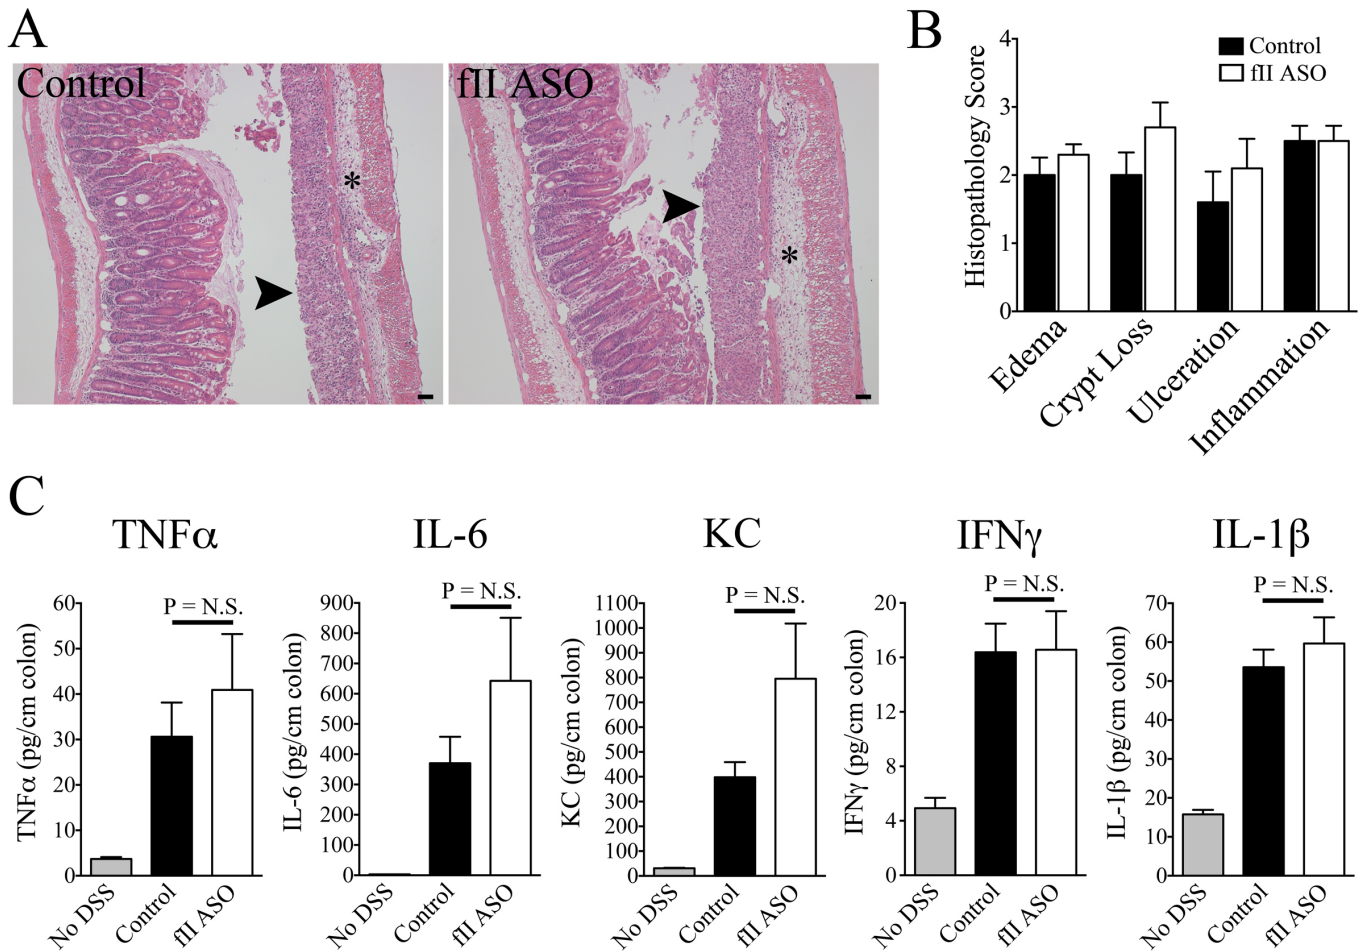

**Supplemental Figure 1: Modest ASO-mediated decrease in circulating prothrombin does not significantly affect mucosal injury, inflammatory cell accumulation or local inflammatory cytokine production following DSS challenge.** (A) Shown are representative photomicrographs of colonic tissue harvested from mice following a 7 day DSS challenge that were treated with either a prothrombin (fII)-specific ASO or a control oligonucleotide. Colons from both cohorts revealed similar degrees of significant mucosal ulcerations (arrows) and inflammatory edema (\*). (B) This was confirmed by detailed analyses using a multiparameter histopathological scoring system. ( $n = 10$  per group,  $P$  values were not significant for each comparison.) (C) Levels of inflammatory cytokines measured in colonic homogenates harvested from control and fII ASO treated mice immediately following 7 days of DSS challenge ( $n = 10$  per group) as well as levels in colons from unchallenged mice ( $n = 4$ ). Note that levels of each cytokine measured were significantly elevated in DSS-challenged colons relative to those from unchallenged mice, but fII ASO treatment had no significant effect on local cytokine levels.

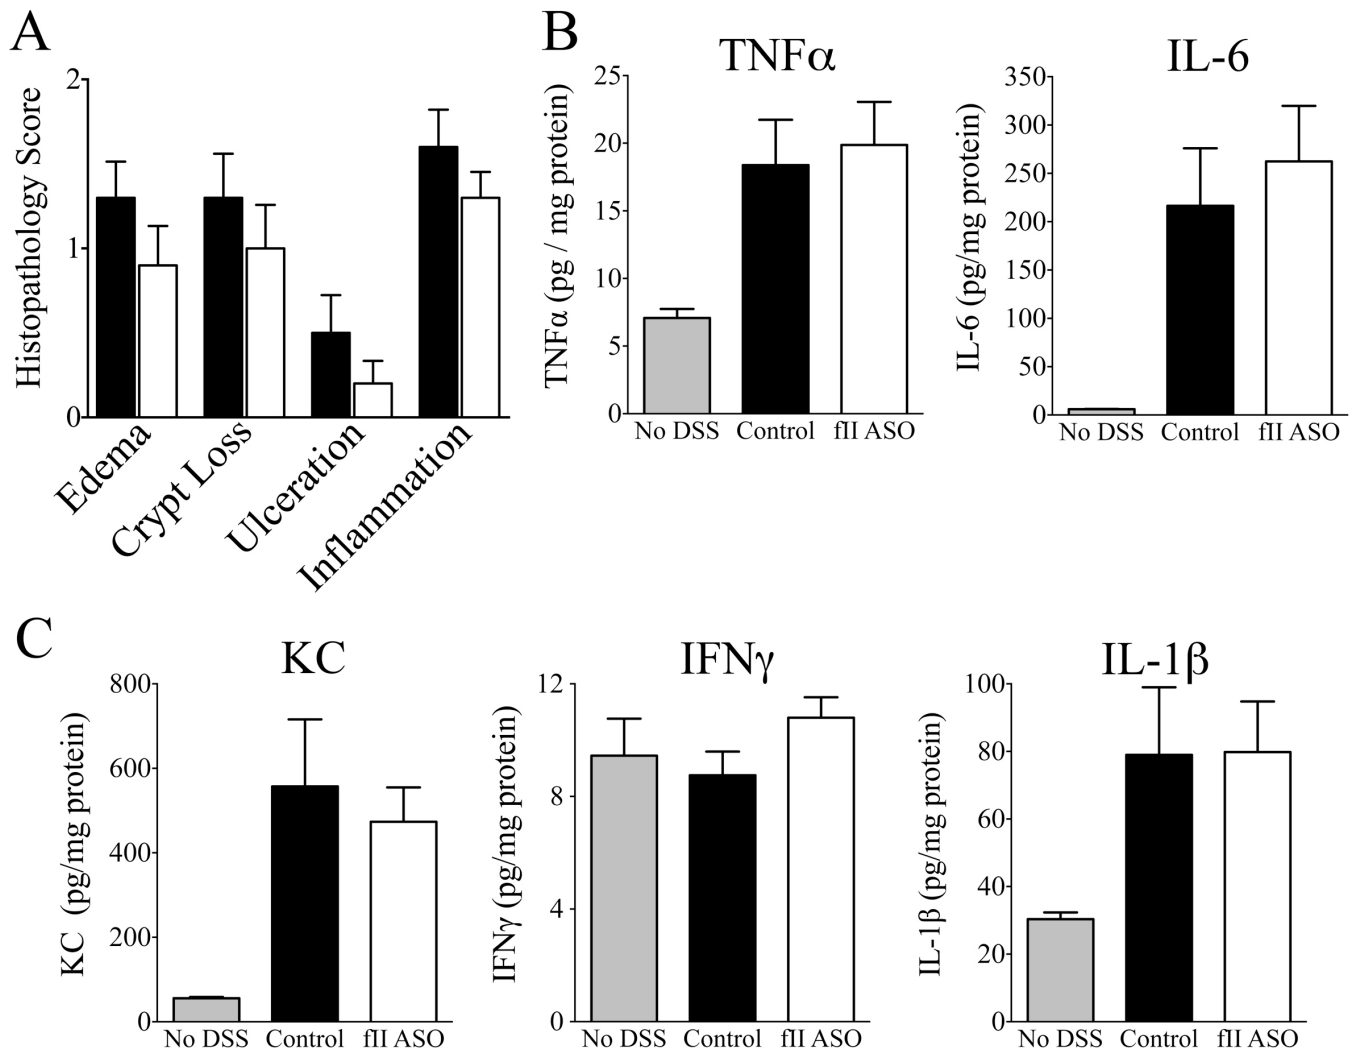

**Supplemental Figure 2: Resolution of inflammation following DSS withdrawal is not significantly affected by a modest ASO-mediated decrease in circulating prothrombin.** (A) Shown are results of detailed multiparameter histopathological analyses of colons harvested from AOM/DSS-challenged mice treated with prothrombin-specific ASO or control oligonucleotide just 1 week after withdrawal of the second course of DSS (i.e., day 42). (n = 10 per group, *P* values were not significant for each comparison.) (B & C) Levels of inflammatory cytokines measured in colonic homogenates harvested at this same time point (n = 10 per group) as well as levels in colons from unchallenged mice (n = 4). Note that levels of each cytokine measured were unaffected by fII ASO treatment.
